# Supplementary material for: Cytological quality of milk of primiparous cows kept in cubicles bedded with separated manure
Source: Copernicus journal article supplement (doi:10.5194/aab-60-19-2017), 2017-02-15
Supplement: Supplementary file 1 [file aab-60-19-2017-supplement.zip]

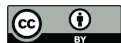

## *Supplement of*

# **Cytological quality of milk of primiparous cows kept in cubicles bedded with separated manure**

**Stanisław Winnicki et al.**

*Correspondence to:* Jolanta Róžańska-Zawieja (jolek@up.poznan.pl)

- aab-60-19-2017-supplement-title-page.pdf
- Copy of BASE.xls

The copyright of individual parts of the supplement might differ from the CC-BY 3.0 licence.
